# Supplementary material
Source: publisher site journal article supplement (https://www.spandidos-publications.com/4047/downloadSupplementary)
Supplement: Supplementary file 1 [file downloadSupplementary]

## Sheet: Gene expression sets
Table SVIII. Comparison with published expression sets.
The DS genes of this study were compared to some other published expression studies (DE). The overlap of DS and DE genes is shown here.
Due to the different analysis concepts (DS versus DE), no full overlap is expected. But it is remarkable, that between 9% and 30% of the genes have a DE and a DS effect.
Hu-Lieskovan S, et al (PMID: 16204072); Selvanathan SP, et al (PMID: 25737553); Hotfilder M, et al (PMID: 30563222)
set size: number of the compared genes in the respective study
number found here: differential splice variants of genes found in the present study / family members partly considered
green: overlap found
	Selvanathan, et al	Hu-Lieskovan, et al	Hotfilder, et al
			Set2:up:SP.NSP-MSC.NSP	Set1:SP-NSP	Oncogenes.Set1	Set3:down:SP.NSP-MSC.NSP
direct correspondence			cf. B,BC,B2	cf. B,BC	cf. B,BC	cf. B,BC,B2
set size / number found here / percentage	10 / 2 / 20%	87 / 19 / 22%	42 / 5 / 12%	312 / 58 / 19%	43 / 13 / 30%	46 / 4 / 9%
						(4 discarded; ENSG: lncRNA)
cf.: S8
full sets of the publications	ARID1A	AK3	ANK3	ABCB1	ASS1	ADM2
	CALD1	ARHGEF1	ATF1	AC058791.1	ATF1	AKR1C2
	CAV3	ARHH	CDK6	AC083843.1	AURKA	AUTS2
	CUL4A	ATF5	CRIM1	ACTL6A	CAV1	CACNG8
	EZH2	ATP1A1	CTGF	ADM2	CCNB1	CAPN10-AS1
	HDAC8	C6orf9	CYR61	AKR1C2	CCNB2	CAPS
	IGFBP3	CAV1	DUSP1	AL355075.1	CDC25C	CCDC136
	RUNX2	CAV2	EBLN2	ANK3	CDH17	CHCHD7
	TERT	CCBL1	EPC1	APOLD1	CDK1	CTDP1
	USP2	CCK	FOS	ARL6IP1	CDK6	DNAH8
		CCND1	FOSL2	ASPM	CDKN2C	ELMO1
		CD1E	HIST1H1C	ASS1	CDKN3	ENSG00000278932
		CD79A	HIST1H2BC	ATAD3C	COPS3	GNB3
		CD99	HIST1H3C	ATF1	CTGF	KCNQ1OT1
		CDH11	HIST2H2AB	ATG3	CXCL1	LINC00342
		CEBPB	HIST2H2AC	ATHL1	DLEU2	LINC00685
		CES1	ID1	ATP11B	DUSP1	LY6H
		CHN2	JUN	AURKA	E2F5	MIAT
		CITED2	KLF6	AUTS2	FAM72A	MIR663AHG
		CRIP2	LMO7	BCYRN1	FAM83D	MTCO2P22
		CSNK1E	LRIG3	bP-21264C1.2	FOS	MTRNR2L13
		CSPG5	LUZP1	BRIX1	FOXO1	MUC19
		CSRP1	MAPRE2	BUB1	ID1	NACAD
		DAPK1	MIR222HG	BUB1B	ID2	NCOR2
		DPYSL2	NBPF10	C4orf48	ISG15	NPW
		EGR2	POPDC3	CACNG8	JUN	OBSCN
		FADS1	RN7SKP160	CAPN10-AS1	KIF14	PDZD7
		FCGRT	RN7SL107P	CAV1	KLF6	PGM5P2
		FLJ14547	RNVU1-6	CCNA2	LIN9	RALGAPA2
		FNBP1	RNY3	CCNB1	LRIG3	RNF139-AS1
		FOS	SMAD7	CCNB2	MEG3	RORB
		FVT1	SOCS5	CDC20	MYC	PRPF31
		G0S2	STOM	CDC25C	NEAT1	RPL28
		GABARAPL1	TFPI2	CDCA2	PBK	RPS6P25
		GLCE	TIPARP	CDCA3	PLK1	RRS1-AS1
		GLG1	TNIK	CDCA8	PTPRD	RYR1
		GPRK5	TRAM1	CDH17	SELENBP1	SELENBP1
		GYG2	TXNDC11	CDK1	SGK1	SLC4A3
		HES1	TXNDC12	CDK6	SPRY4	SNHG25
		HLA-E	VMP1	CDKN2C	TFPI2	SNORD41
		HOXD9	ZNF184	CDKN3	TGFBI	SYT2
		ID2	CH17-373J23.1	CENPA	UBE2C	ZNF789
		IGFBP4		CENPE	UBE2QL1
		IL1RAP		CEP55
		IPO13		CEP85
		JAK1		CH17-373J23.1
		KIAA0746		CHCHD7
		KIAA0794		CKAP2L
		KIAA0893		CKS2
		LNK		CLIP3
		LOH11CR2A		COPS3
		LY96		CRIM1
		MAN2A2		CSE1L
		MAPT		CSRNP2
		ME1		CTD-2287O16.1
		MGC27165		CTD-3222D19.8
		MSX1		CTGF
		MYC		CTTNBP2
		MYO10		CXCL1
		Nbak2		CYR61
		NELL2		DCLK1
		NPTXR		DDX21
		OLFM1		DEPDC1
		PFKP		DHRS11
		PFTK1		DIMT1
		PPFIA3		DLEU2
		PRKCB1		DLGAP5
		PSEN1		DNAH8
		PTPNS1		DNAJC8
		RAP1GA1		DPYSL3
		RCOR		DUSP1
		RUNX3		E2F5
		SIAT1		EBLN2
		SLC1A4		EEF1A1P5
		SMA5		ELMO1
		SMARCC1		ENPP2
		SORD		EPC1
		STARD13		ERAP1
		STAT6		ERCC6L
		STEAP		FABP4
		SYT1		FABP5
		TRIM2		FAM64A
		UAP1		FAM72A
		WNT5A		FAM83D
		XPNPEP1		FOPNL
		ZDHHC3		FOS
		ZNF183		FOSB
				FOSL2
				FOXO1
				FP236383.10
				FTH1
				GAS2L3
				GNB3
				GPSM2
				HDAC9
				HES1
				HIST1H1C
				HIST1H2AE
				HIST1H2AG
				HIST1H2AK
				HIST1H2AL
				HIST1H2BB
				HIST1H2BC
				HIST1H2BF
				HIST1H2BG
				HIST1H2BH
				HIST1H2BI
				HIST1H2BL
				HIST1H2BN
				HIST1H3B
				HIST1H3C
				HIST1H3G
				HIST1H4D
				HIST1H4H
				HIST2H2AB
				HIST2H2AC
				HJURP
				HMGB2
				HMMR
				HSP90AA1
				HSPH1
				HYLS1
				ID1
				ID2
				ISG15
				JPH1
				JUN
				KBTBD2
				KBTBD8
				KCNQ1OT1
				KIF14
				KIF18A
				KIF20A
				KIF23
				KIF2C
				KLF6
				KNSTRN
				KPNA2
				LA16c-360H6.3
				LDHA
				LIN9
				LINC00342
				LINC00685
				LMO7
				LRIG3
				LRP1
				LUZP1
				LY6H
				MAD2L1
				MAPRE2
				MEG3
				MIAT
				MIR222HG
				MIR663AHG
				MKX
				MLC1
				MPP4
				MSL2
				MTCO2P22
				MTND1P23
				MTND2P28
				MTND5P11
				MTRNR2L13
				MUC19
				MYC
				NBPF10
				NCAPD3
				NCAPH
				NCOR2
				NDC1
				NEAT1
				NEK2
				NOP16
				NPAT
				NPM1P5
				NPW
				NRIP1
				NRXN3
				NSDHL
				NUF2
				NUP35
				NUSAP1
				OBSCN
				OIP5
				P3H2
				PBK
				PDZD7
				PGM5P2
				PLEKHF2
				PLK1
				PLXNA3
				PNPT1
				POPDC3
				PRC1
				PRPS1
				PSRC1
				PTPRD
				PWWP2A
				RACGAP1
				RALGAPA2
				RANGAP1
				RHOBTB3
				RN7SKP160
				RN7SKP9
				RN7SL107P
				RN7SL118P
				RN7SL181P
				RNF139-AS1
				RNF26
				RNU1-11P
				RNU1-42P
				RNU1-77P
				RNU11
				RNU12
				RNU4-2
				RNU5A-1
				RNU5B-1
				RNU5E-1
				RNVU1-17
				RNVU1-6
				RNY1
				RNY1P13
				RNY3
				RORB
				RP1-34B20.21
				RP11-113I24.1
				RP11-178H8.7
				RP11-303E16.2
				RP11-332M2.1
				RP11-334C17.5
				RP11-438B23.2
				RP11-481C4.2
				RP11-797A18.5
				RP11-863K10.7
				RP5-1198O20.4
				RP5-875O13.1
				RPL28
				RPS24P8
				RPS28
				RPS6P25
				RRM2
				RRS1-AS1
				RSBN1
				RUNDC3B
				RYR1
				SALL1
				SAPCD2
				SCARNA12
				SCARNA8
				SELENBP1
				SETP14
				SGK1
				SGOL2
				SKA3
				SLC14A1
				SLC25A17
				SLC4A3
				SMAD7
				SNHG25
				SNORA28
				SNORA38
				SNORA53
				SNORA66
				SNORA71A
				SNORD14E
				SNORD17
				SNORD3A
				SNORD41
				SNORD71
				SOCS5
				SORD
				SPAG5
				SPRY4
				STOM
				SYT2
				TBC1D4
				TFPI2
				TGFBI
				TIPARP
				TMEM97
				TMPO
				TMPO-AS1
				TMX2
				TNIK
				TOP2A
				TPX2
				TRAM1
				TRIP13
				TTK
				TUBG1
				TXNDC11
				TXNDC12
				U1
				UBE2C
				UBE2QL1
				UBE2T
				USP42
				UTS2
				VMP1
				WDR20
				WDR35
				WDR43
				WDR97
				ZBTB2
				ZC3H12C
				ZFX
				ZNF143
				ZNF184
				ZNF267
				ZNF367
				ZNF480
				ZNF789
